# Supplementary material for: An efficient hybrid downscaling framework to estimate high-resolution river hydrodynamics
Source: Copernicus journal article supplement (doi:10.5194/hess-29-3833-2025), 2025-08-18
Supplement: Supplementary file 1 [file hess-29-3833-2025-supplement.pdf]

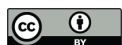

*Supplement of*

## **An efficient hybrid downscaling framework to estimate high-resolution river hydrodynamics**

**Zeli Tan et al.**

*Correspondence to:* Zeli Tan (zeli.tan@pnnl.gov)

The copyright of individual parts of the supplement might differ from the article licence.

**Table S1.** Gauge information.

| <b>Gauge #</b> | <b>USGS ID</b> | <b>Longitude</b> | <b>Latitude</b> |
|----------------|----------------|------------------|-----------------|
| 1              | 08072300       | -95.8069         | 29.7433         |
| 2              | 08072350       | -95.7672         | 29.7230         |
| 3              | 08072470       | -95.6432         | 29.7694         |
| 4              | 08072520       | -95.7096         | 29.8051         |
| 5              | 08072600       | -95.6869         | 29.8308         |
| 6              | 08072680       | -95.6466         | 29.8672         |
| 7              | 08072700       | -95.6258         | 29.8358         |
| 8              | 08072730       | -95.6239         | 29.7903         |
| 9              | 08072760       | -95.6058         | 29.7619         |
| 10             | 08072800       | -95.5577         | 29.7622         |
| 11             | 08073100       | -95.5236         | 29.7469         |
| 12             | 08073500       | -95.4086         | 29.7602         |
| 13             | 08073600       | -95.4805         | 29.8708         |
| 14             | 08073700       | -95.4880         | 29.8513         |
| 15             | 08074000       | -95.4694         | 29.8280         |
| 16             | 08074020       | -95.3972         | 29.7752         |
| 17             | 08074150       | -95.3681         | 29.7928         |
| 18             | 08074250       | -95.3585         | 29.7666         |
| 19             | 08074500       | -95.291          | 29.7494         |

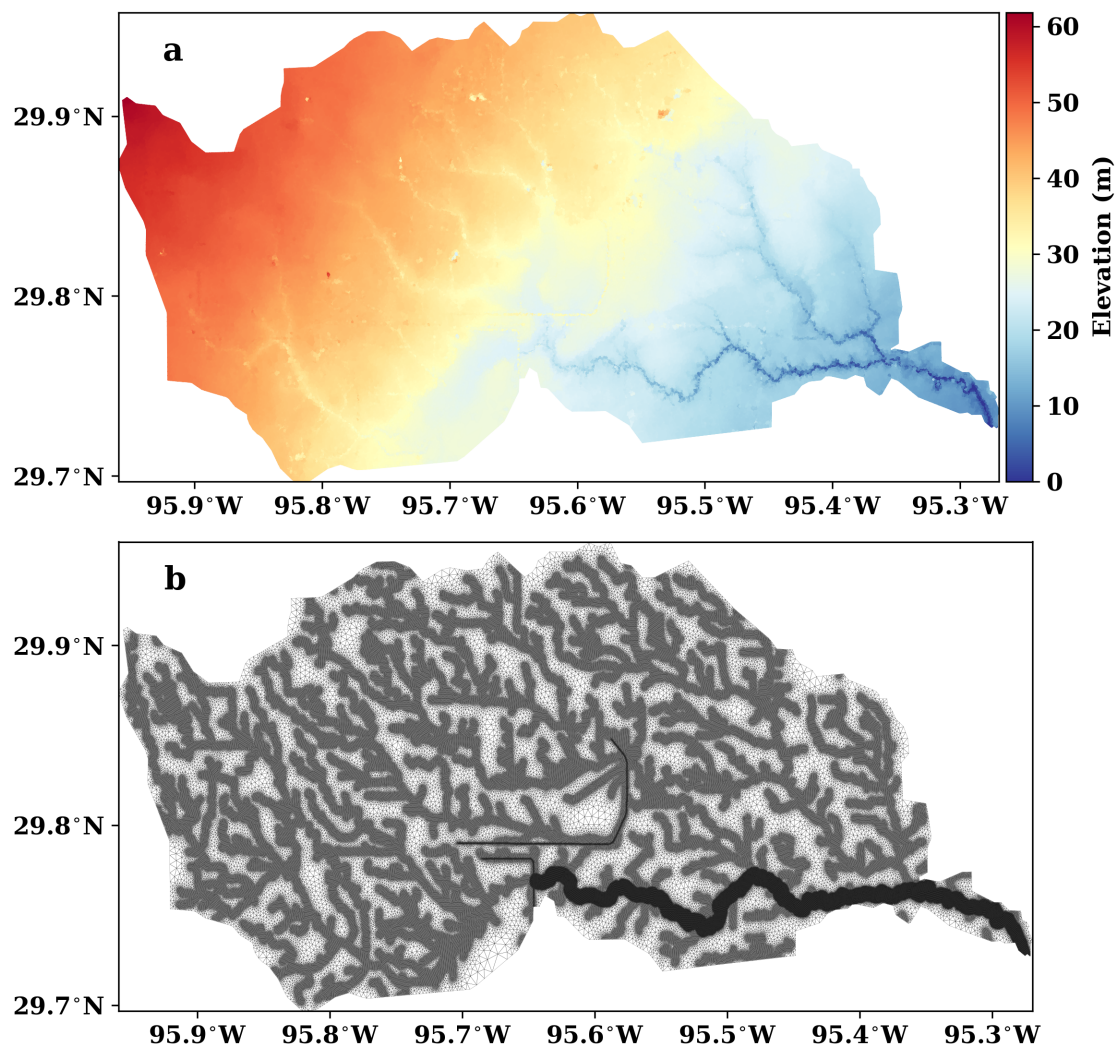

**Figure S1.** Topography data (a) used for the fine resolution mesh (b).

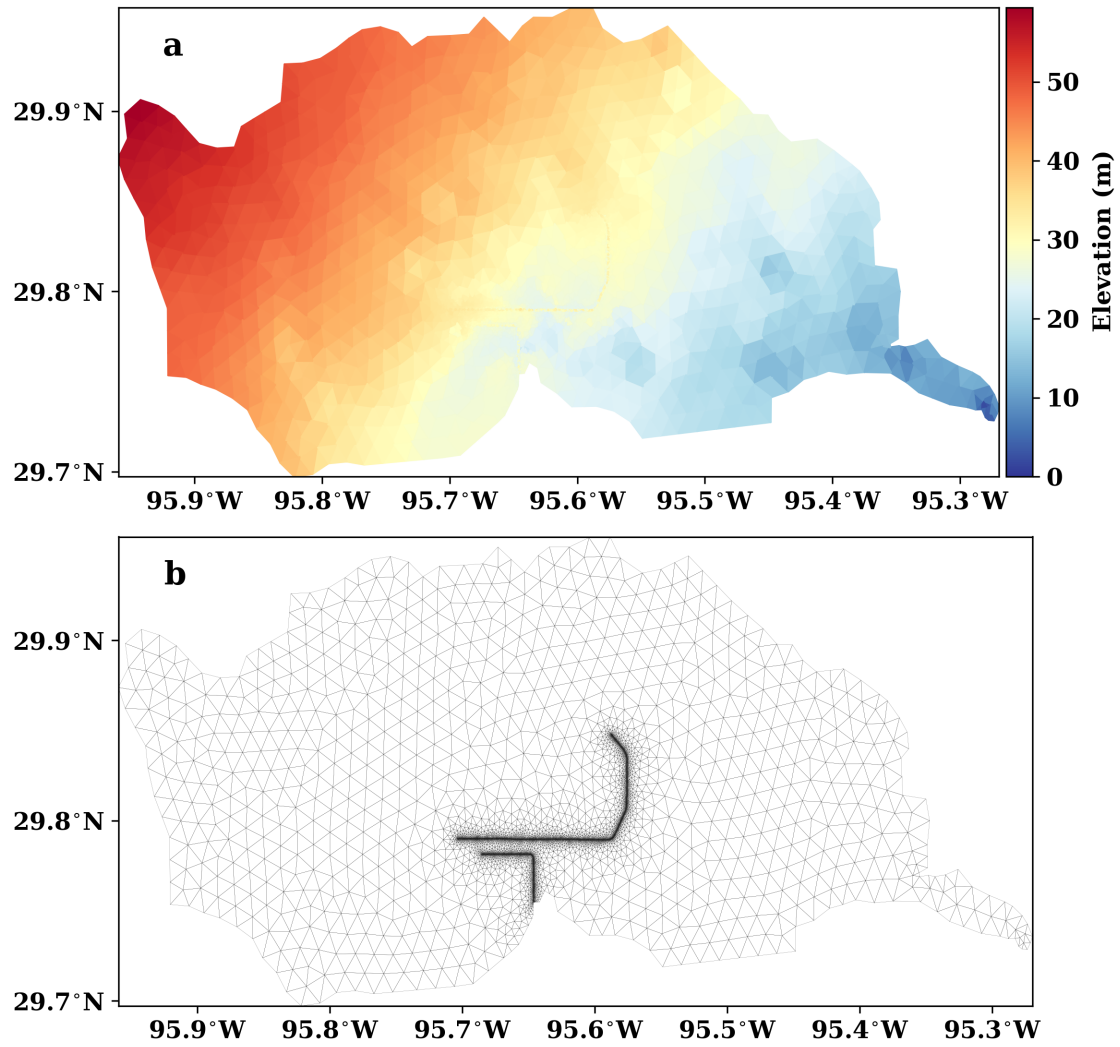

**Figure S2.** Topography data (a) used for the coarse resolution mesh (b).



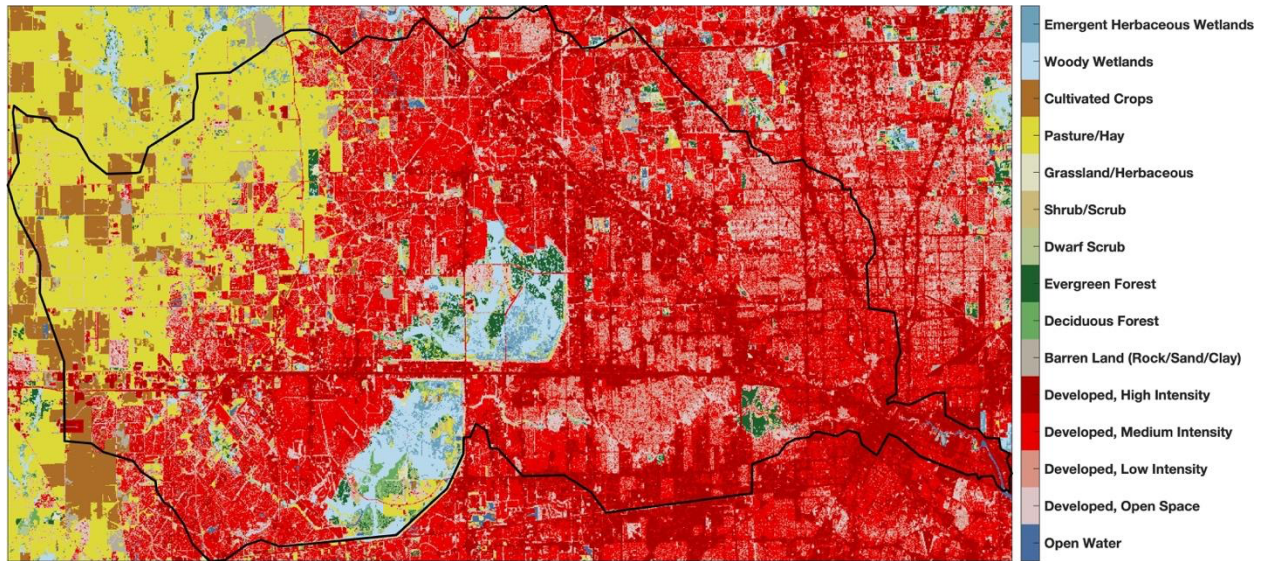

**Figure S3.** National Land Cover Dataset for the study domain. The black line delineates the watershed boundary.

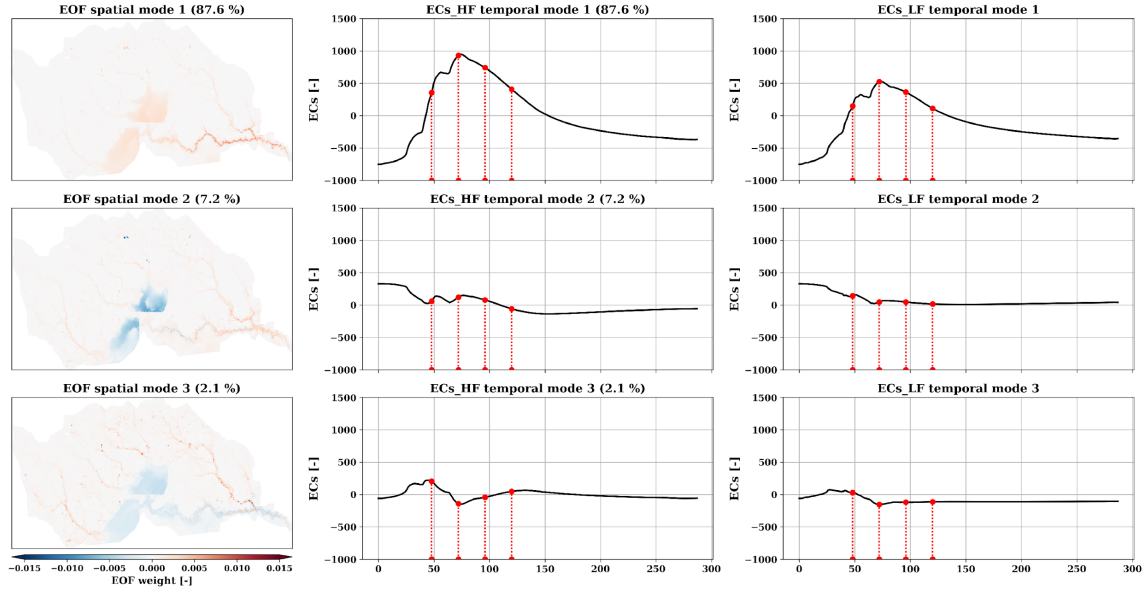

**Figure S4.** The first three EOF spatial modes (first column) and the corresponding ECs temporal modes of the high-fidelity (second column) and low-fidelity (third column) flow depth simulations for the Harvey flood event. The proportion of variance explained by the specific modes is shown in parentheses. Red dashed lines and dots indicate the timesteps at the 48th, 72th, 96th, and 120th hour time steps of the simulations. Blank grid cells in the maps of EOF spatial modes are dry grid cells.

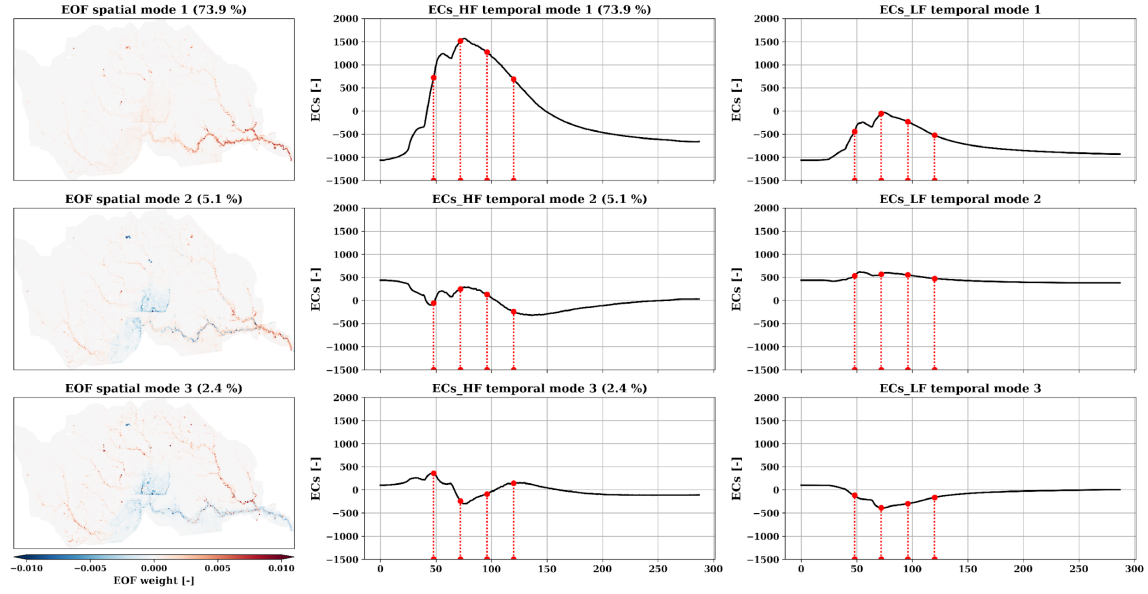

**Figure S5.** The first three EOF spatial modes (first column) and the corresponding ECs temporal modes of the high-fidelity (second column) and low-fidelity (third column) flow velocity simulations for the Harvey flood event. The proportion of variance explained by the specific modes is shown in parentheses. Red dashed lines and dots indicate the timesteps at the 48th, 72th, 96th, and 120th hour time steps of the simulations. Blank grid cells in the maps of EOF spatial modes are dry grid cells.

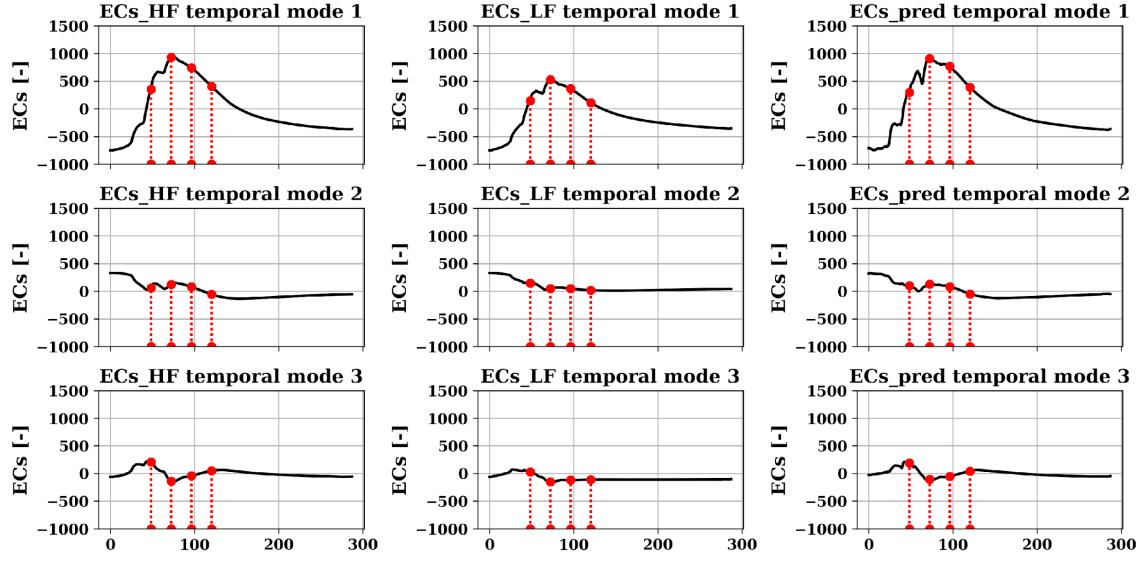

**Figure S6.** The first three ECs temporal modes of the high-fidelity (first column) and low-fidelity (second column) flow depth simulations, and the predicted first three ECs temporal modes for flow depth downscaling (third column) for the Harvey flood event. Red dashed lines and dots indicate the timesteps at the 48th, 72th, 96th, and 120th hour time steps of the simulations.

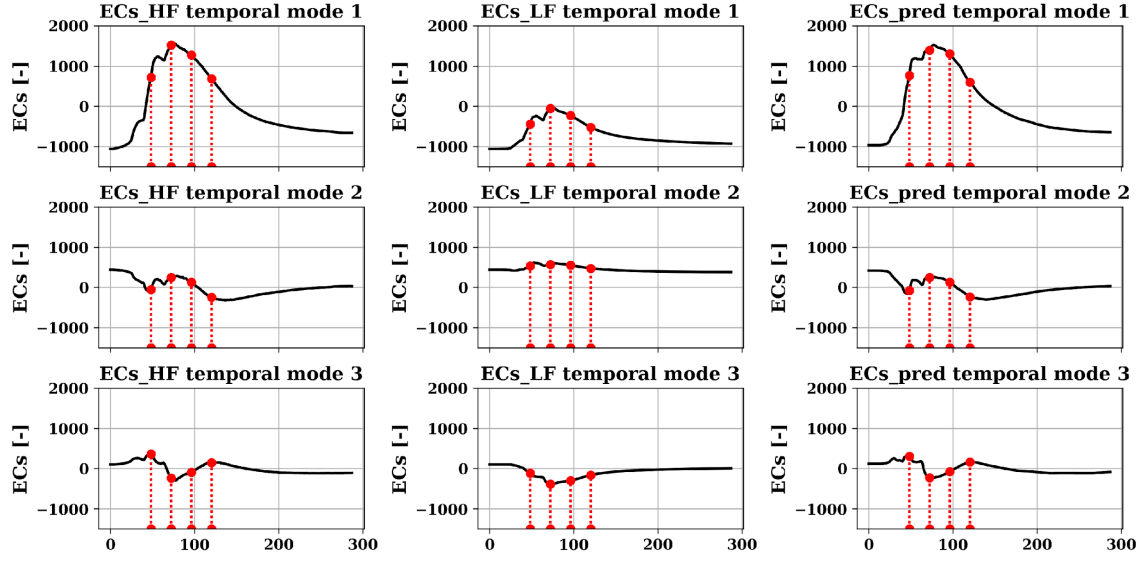

**Figure S7.** The first three ECs temporal modes of the high-fidelity (first column) and low-fidelity (second column) flow velocity simulations, and the predicted first three ECs temporal modes for flow velocity downscaling (third column) for the Harvey flood event. Red dashed lines and dots indicate the timesteps at the 48th, 72th, 96th, and 120th hour time steps of the simulations.

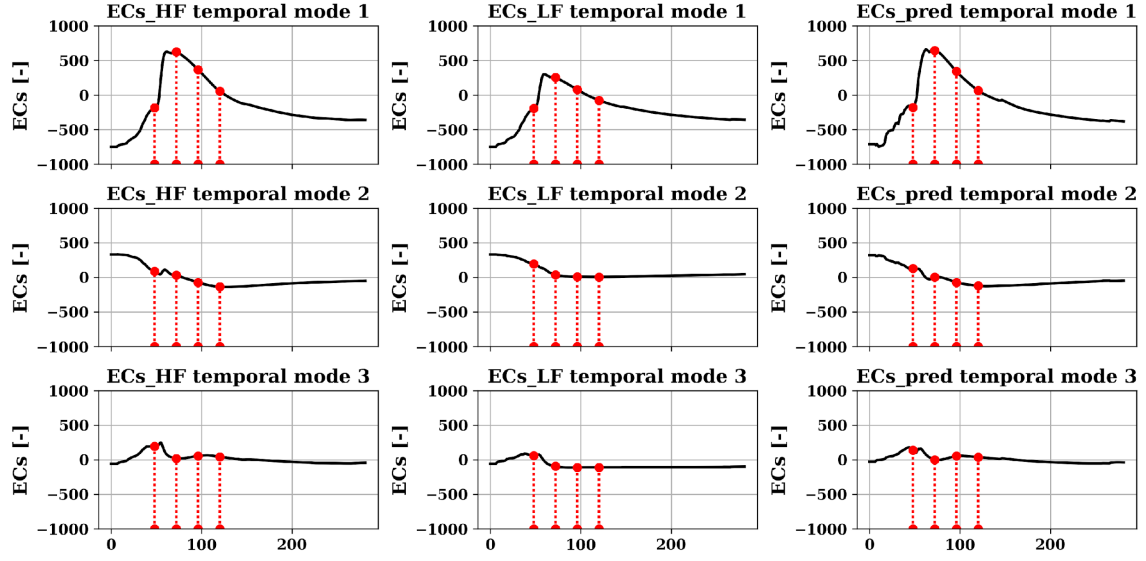

**Figure S8.** The first three ECs temporal modes of the high-fidelity (first column) and low-fidelity (second column) flow depth simulations, and the predicted first three ECs temporal modes for flow depth downscaling (third column) for the PGW flood event. Red dashed lines and dots indicate the 48th, 72th, 96th, and 120th hour time steps of the simulations.

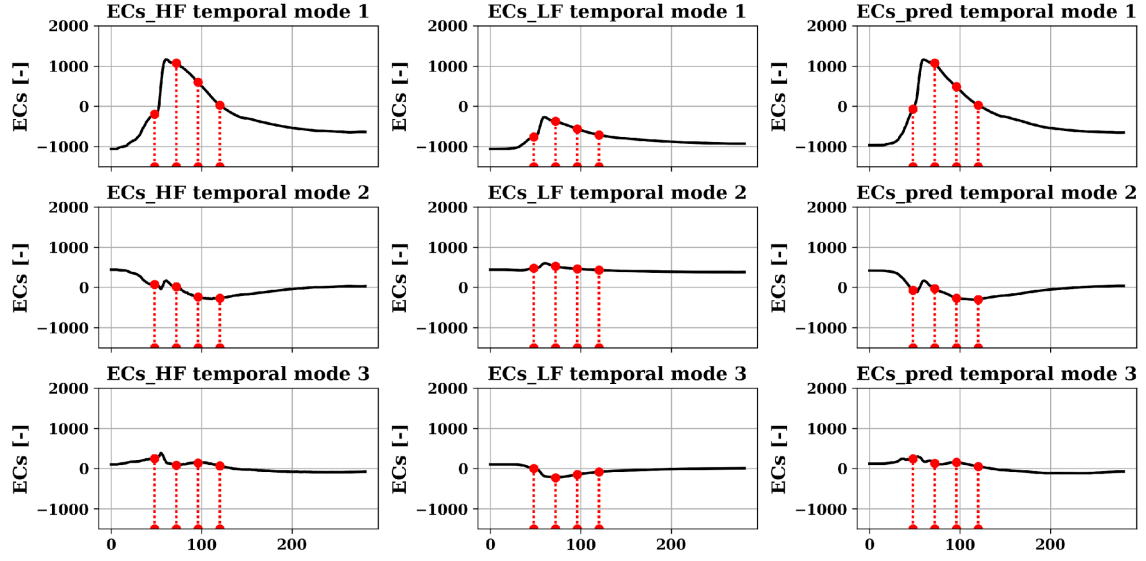

**Figure S9.** The first three ECs temporal modes of the high-fidelity (first column) and low-fidelity (second column) flow velocity simulations, and the predicted first three ECs temporal modes for flow velocity downscaling (third column) for the PGW flood event. Red dashed lines and dots indicate the 48th, 72th, 96th, and 120th hour time steps of the simulations.

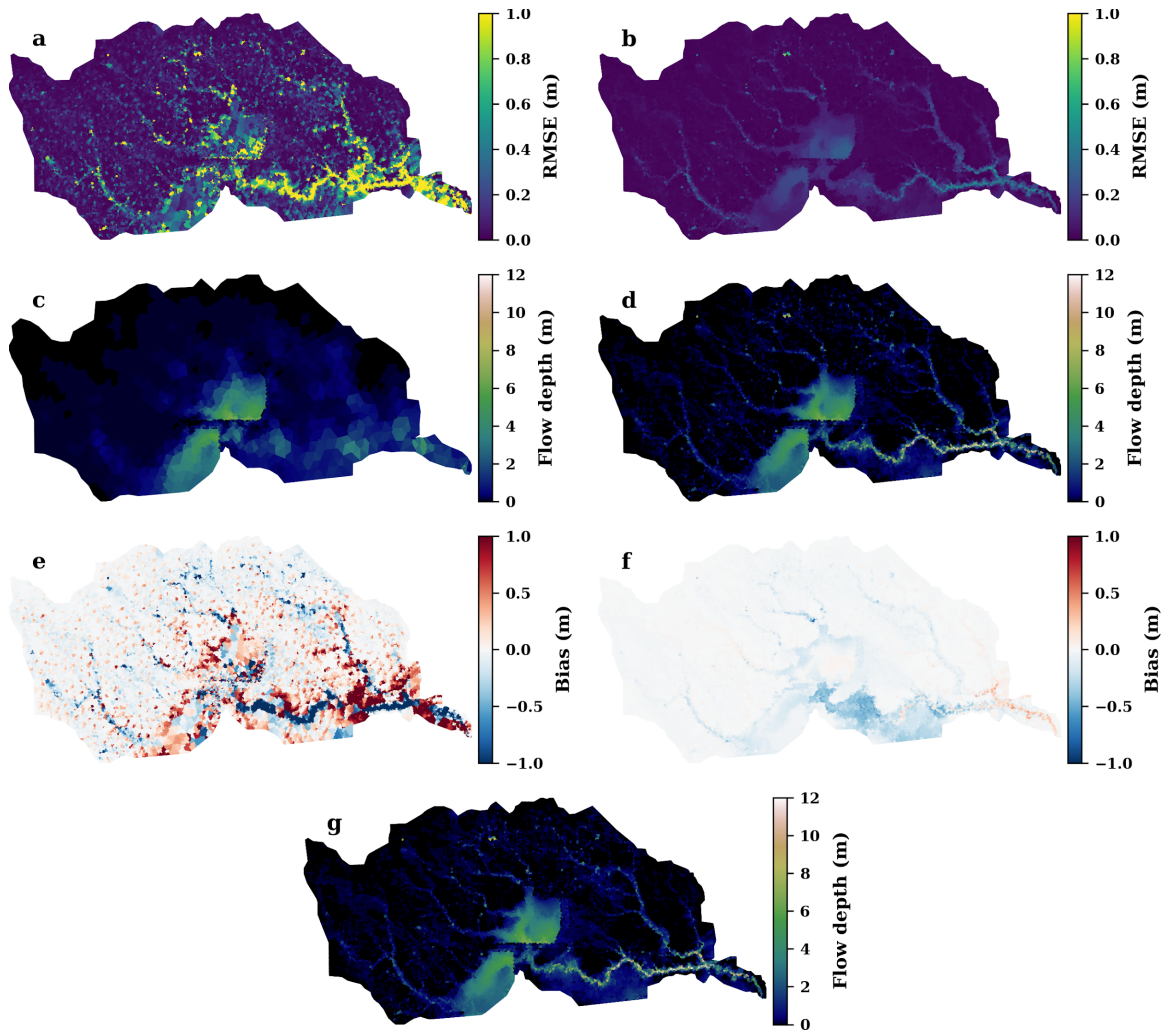

**Figure S10.** RMSE of simulated flow depth of the low-fidelity (a) and downscaled model (b) for the Harvey flood event, simulated flow depth of the low-fidelity (c) and downscaled model (d) at 01:00 am August 27, bias of the low-fidelity (e) and downscaled model (f) simulations at the timestep, and simulated flow depth of the high-fidelity model (g) at the timestep. RMSE and bias are calculated based on the difference between the low-fidelity or downscaled simulation and the high-fidelity simulation.



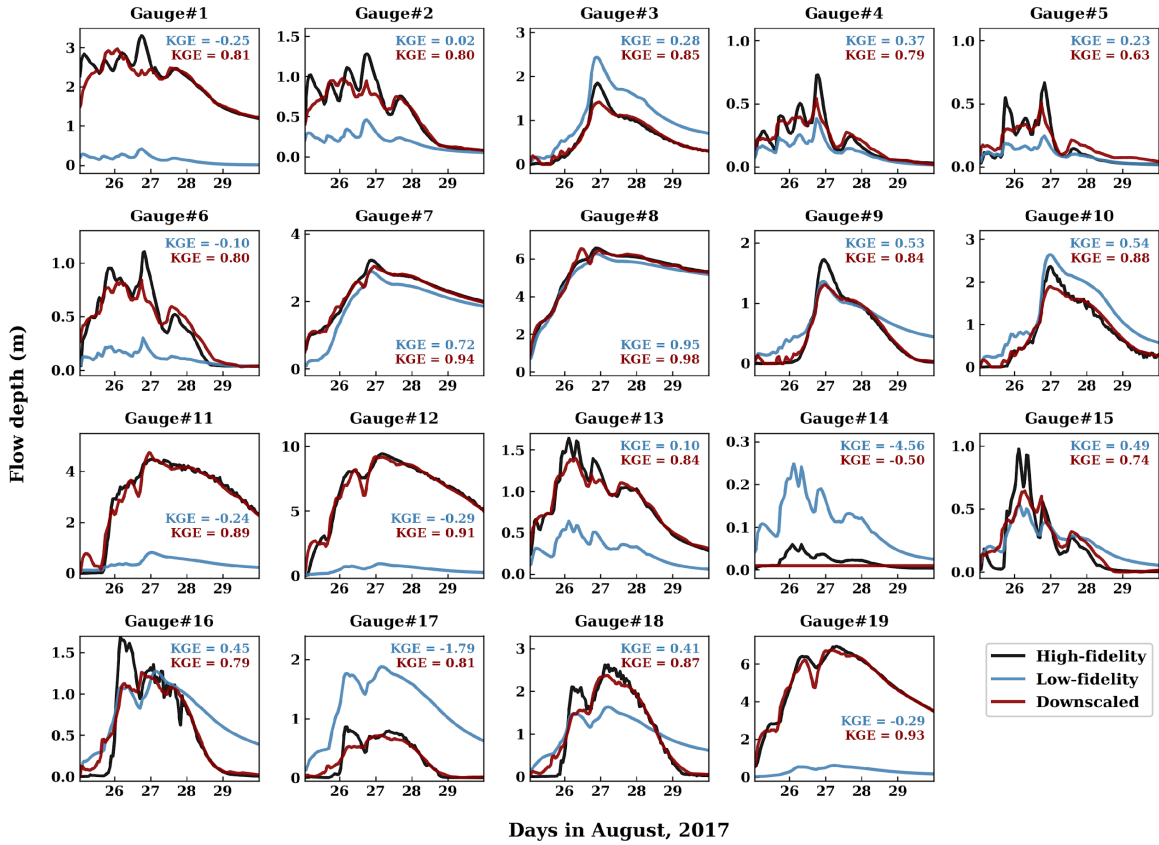

**Figure S11.** Comparison of the simulated flow depth of the high-fidelity model, the low-fidelity model, and the downscaled model at the selected USGS gauges (see Table S1 and Figure 2b) during the Harvey flood event.

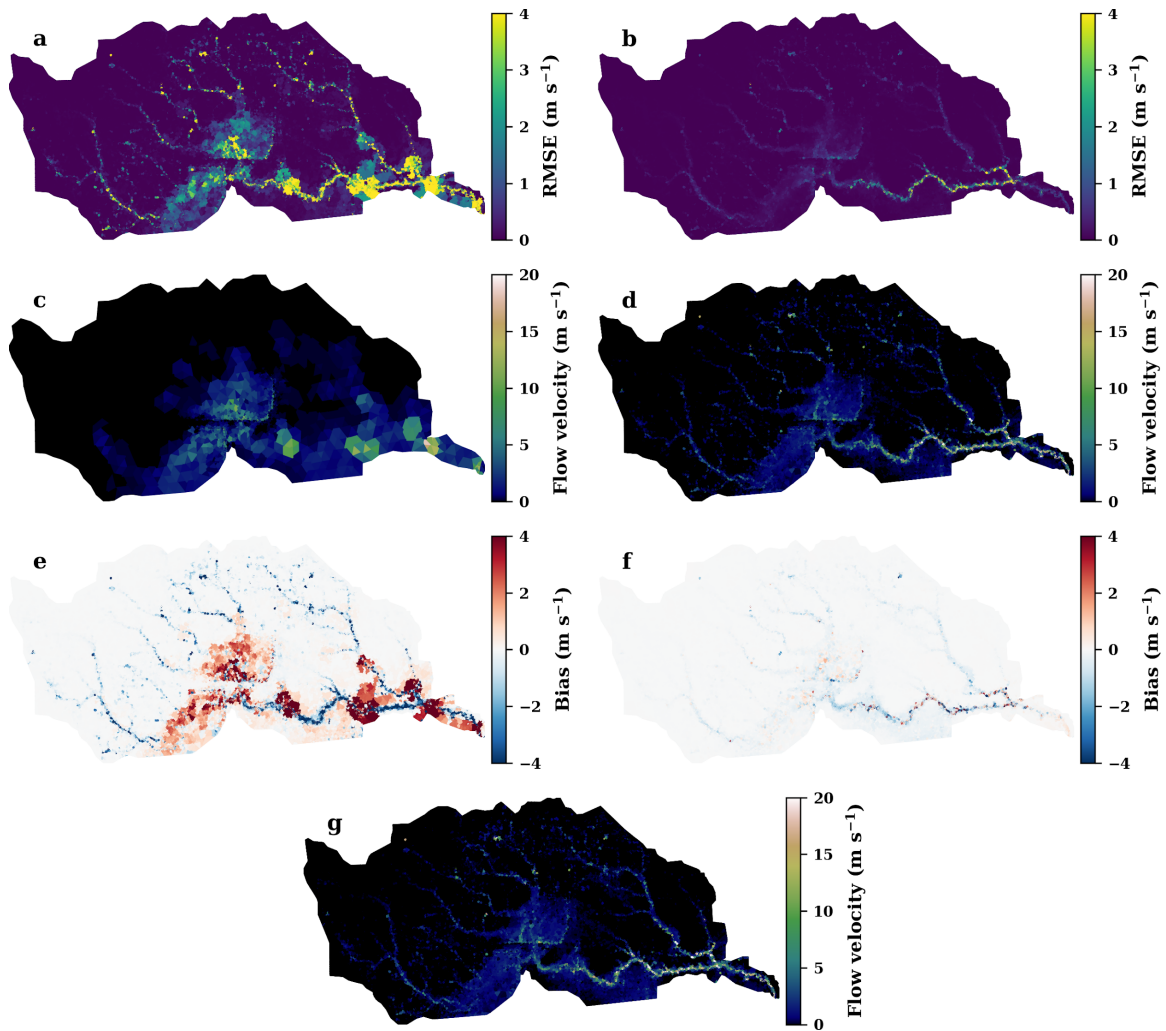

**Figure S12.** RMSE of the simulated flow velocity of the low-fidelity (a) and downscaled model (b) for the Harvey flood event, simulated flow velocity of the low-fidelity (c) and downscaled model (d) at 01:00 am August 27, bias of the low-fidelity model (e) and downscaled model (f) simulations at the timestep, and simulated flow velocity of the high-fidelity model (g) at the timestep. RMSE and bias are calculated based on the difference between the low-fidelity or downscaled simulation and the high-fidelity simulation.

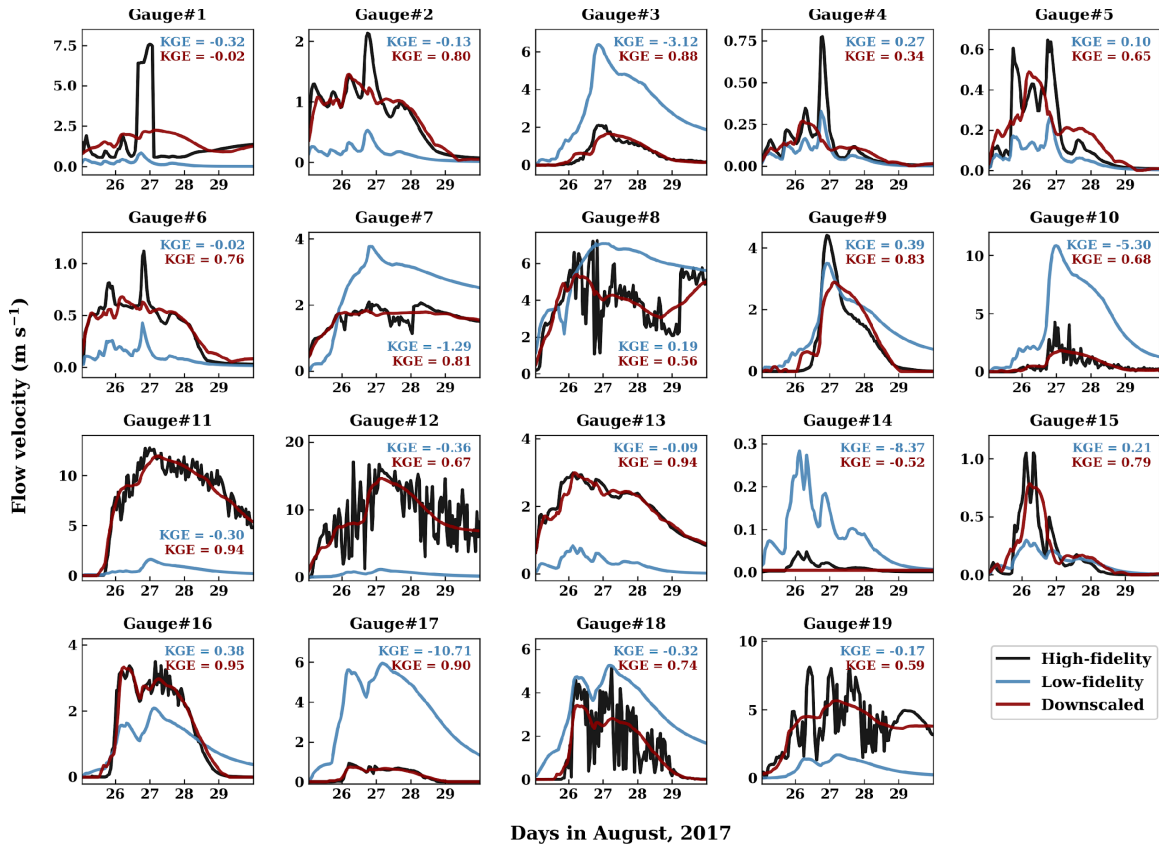

**Figure S13.** Comparison of the simulated flow velocity of the high-fidelity model, the low-fidelity model, and the downscaled model at the selected USGS gauges (see Table S1 and Figure 2b) during the Harvey flood event.

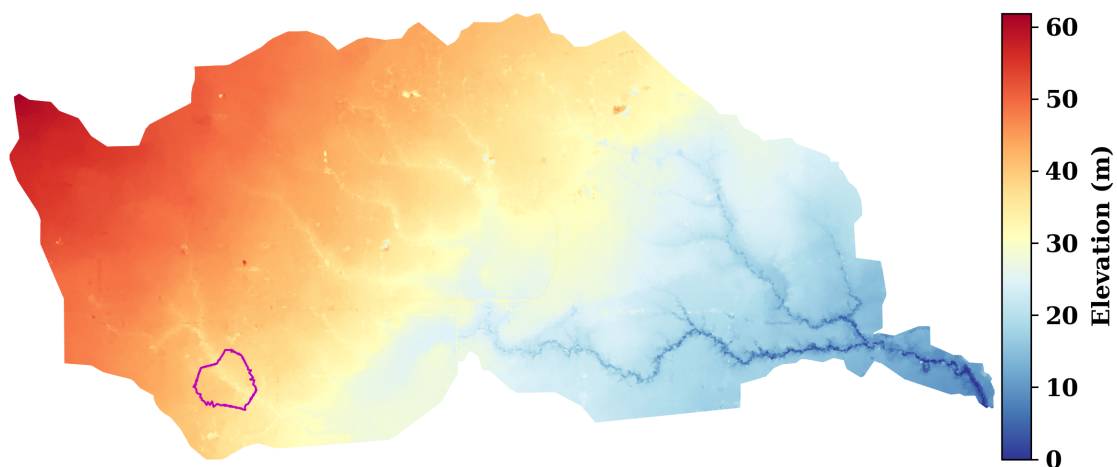

**Figure S14.** The area (circled in magenta) in the study domain selected for regionalized training of the LSG models for Gauge #1.
